# Supplementary material for: UbcH10 overexpression increases carcinogenesis and blocks ALLN susceptibility in colorectal cancer
Source: PubMed Central journal article supplement — Sci Rep. 2014 Nov 7;4:6910. doi: 10.1038/srep06910 (PMC4223683; doi:10.1038/srep06910), 2014-11-07
Supplement: srep06910-s1.pdf [file srep06910-s1.pdf]

## Supplementary Materials for

### **UbcH10 overexpression increases carcinogenesis and blocks ALLN susceptibility in colorectal cancer**

Shang-Ze Li<sup>1,3</sup>, Yang Song<sup>1,3</sup>, Hui-Hui Zhang<sup>1</sup>, Bing-Xue Jin<sup>1</sup>, Yi Liu<sup>1</sup>, Wen-Bin Liu<sup>2</sup>, Xiao-Dong Zhang<sup>1,\*</sup>, Run-Lei Du<sup>1,\*</sup>

**This PDF file includes:**

Fig. S1

Figure S1

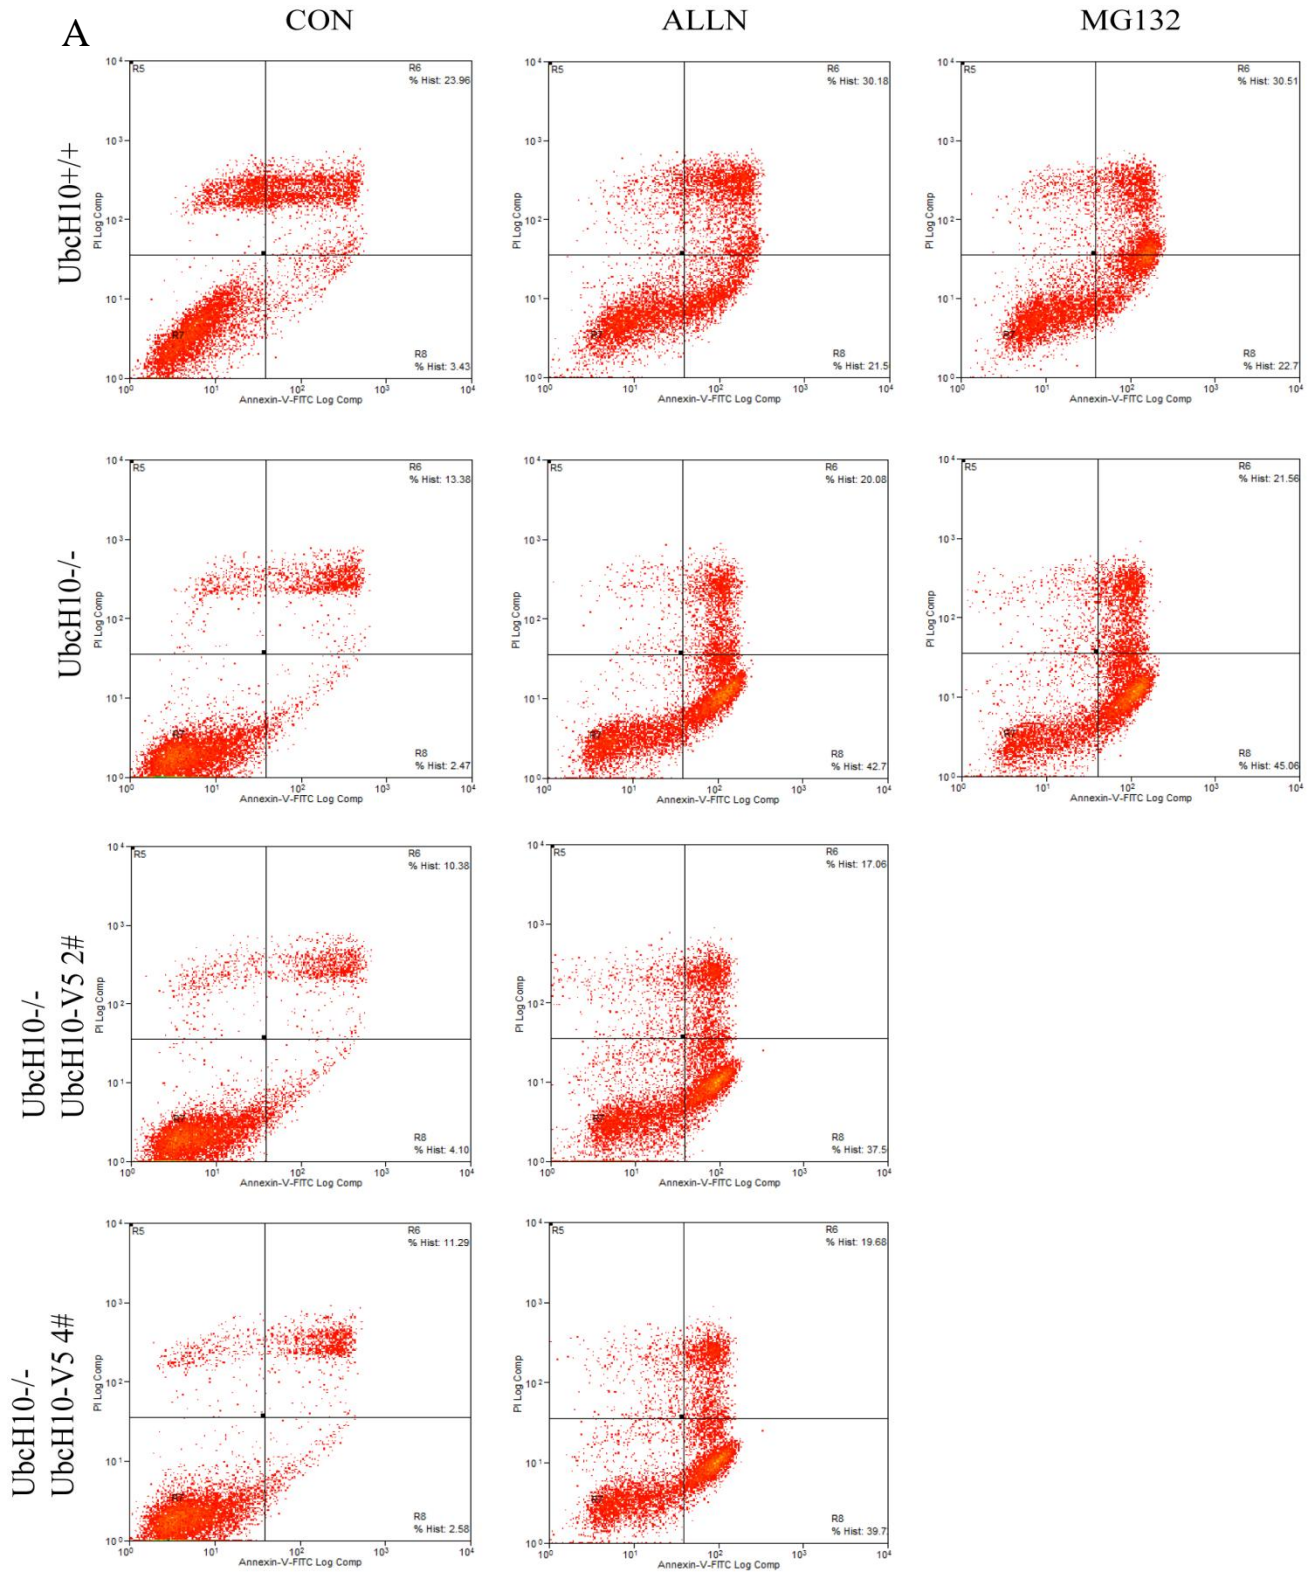

B

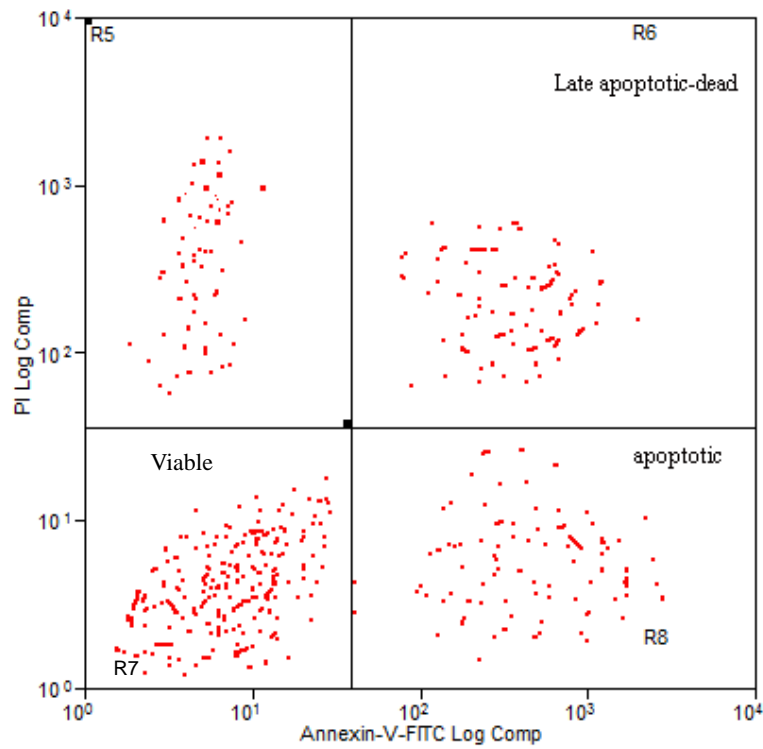

Figure S1. A. Annexin-V/PI staining followed by flow cytometry. Approximately  $1 \times 10^5$  of the indicated cells were seeded in 12 well plates. DLD1, DLD1-UbcH10<sup>-/-</sup> cells and DLD1-UbcH10<sup>-/-</sup>-UbcH10-V5 were exposed to ALLN(26  $\mu$ M) or MG132(3.3 $\mu$ M) for 24 hours. Total cells were then collected and stained with Annexin-V/PI for 15 min, and apoptosis was analyzed via flow cytometry. B. An example of annexin-V/PI plot. R6, R7, R8 panel indicates late apoptotic cells, the viable cells, and the apoptotic cells, respectively. The apoptotic ratios were calculated by adding up R6 and R8.
